# Supplementary material for: Costing the Scale-Up of a National Primary School-Based Fluoride Varnish Program for Aboriginal Children Using Dental Assistants in Australia
Source: MDPI journal article supplement (doi:10.3390/ijerph17238774), 2020-11-26

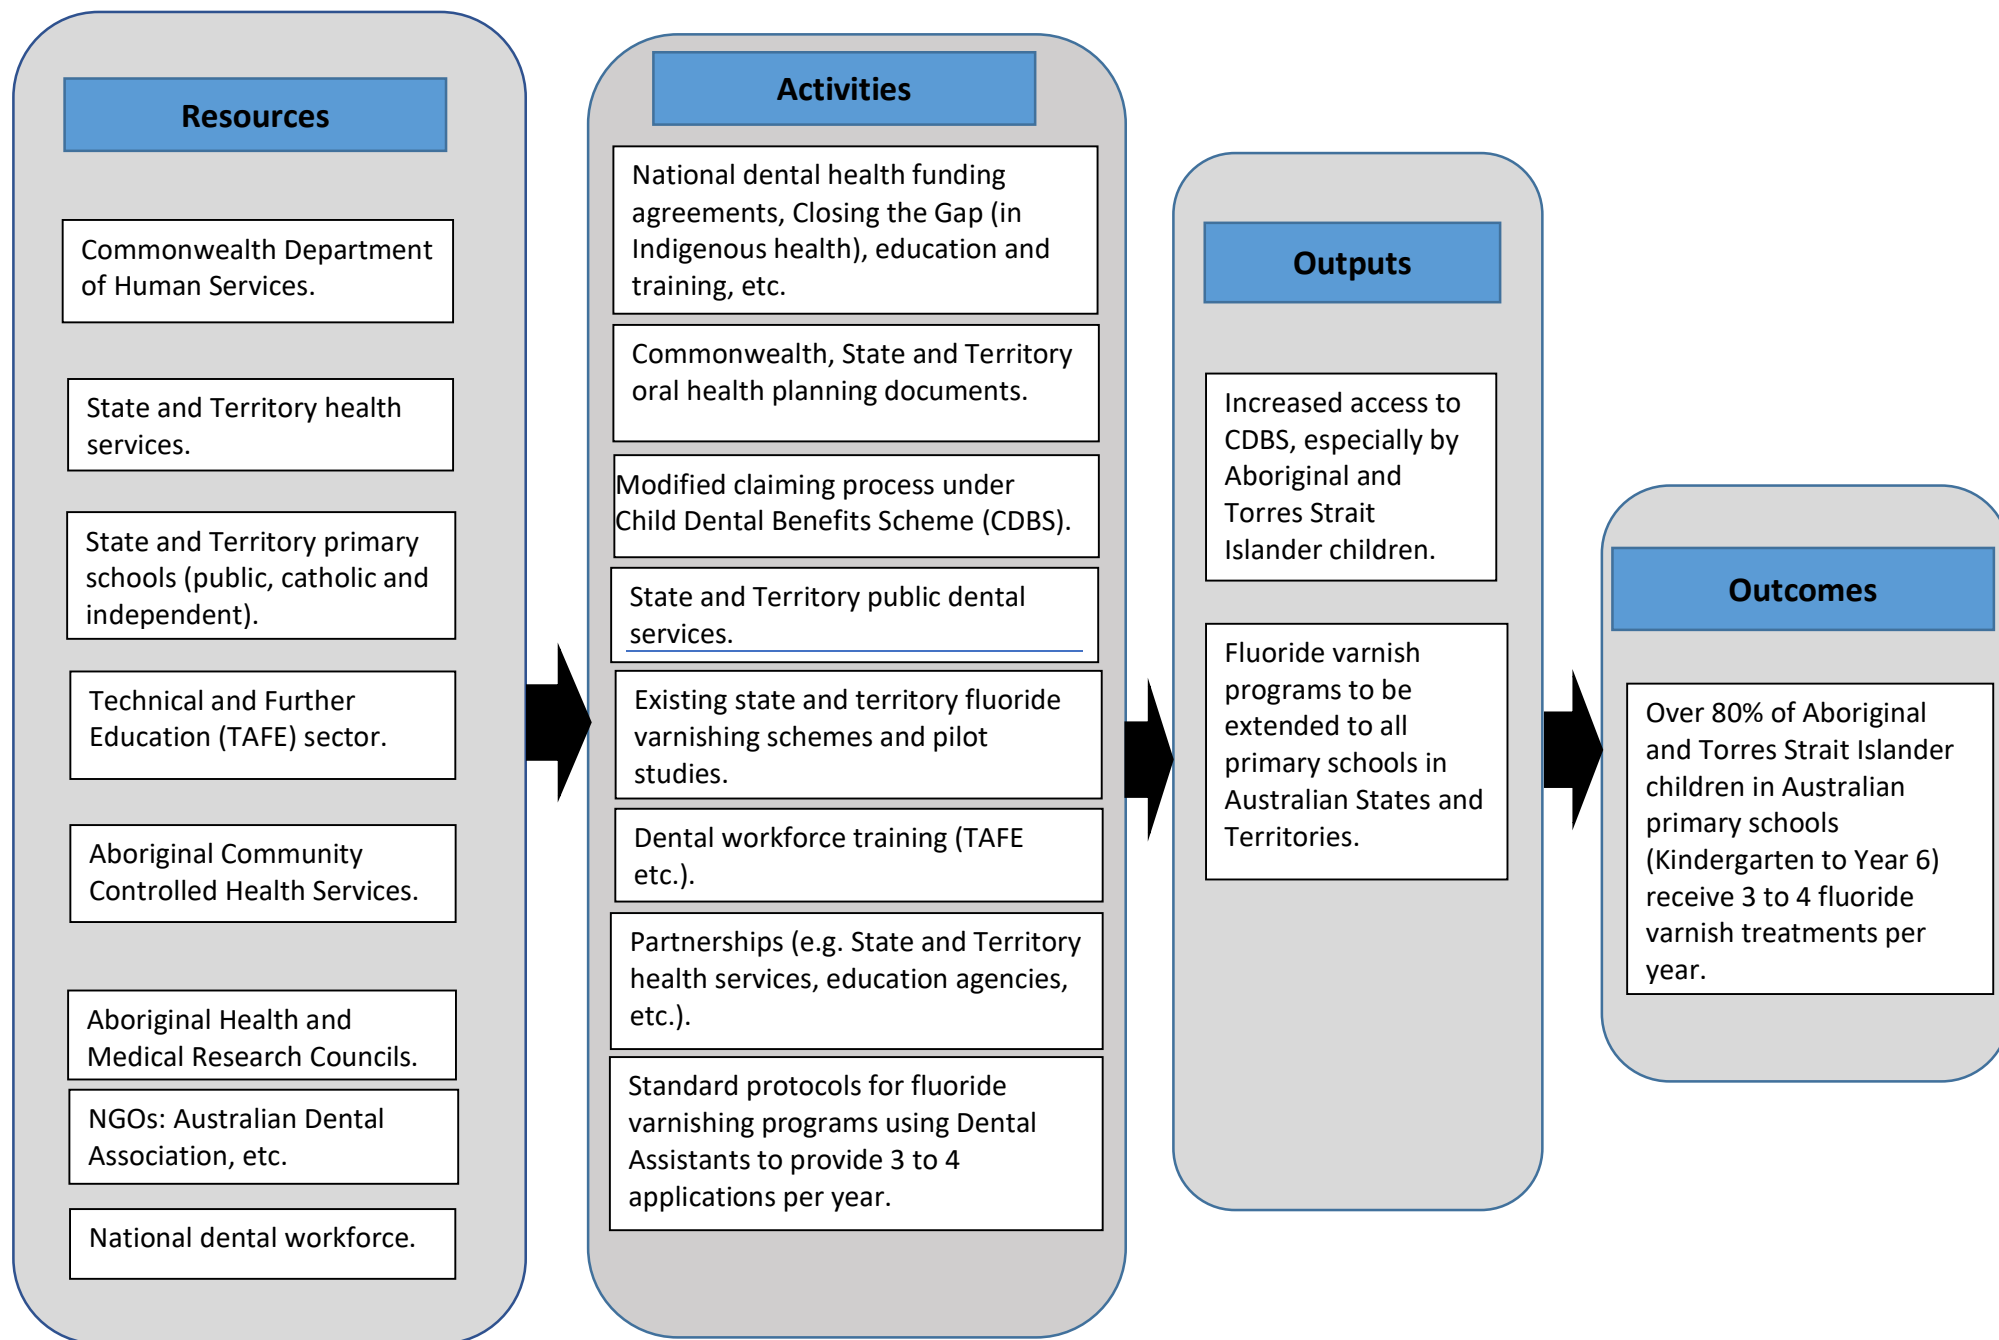

Supplement: s1 [file s1]
